# Supplementary material
Source: Springer Nature journal article supplement (https://www.springermedizin.de/resource/supplementary/12955_2008_542_MOESM1_ESM.pdf/9560672)

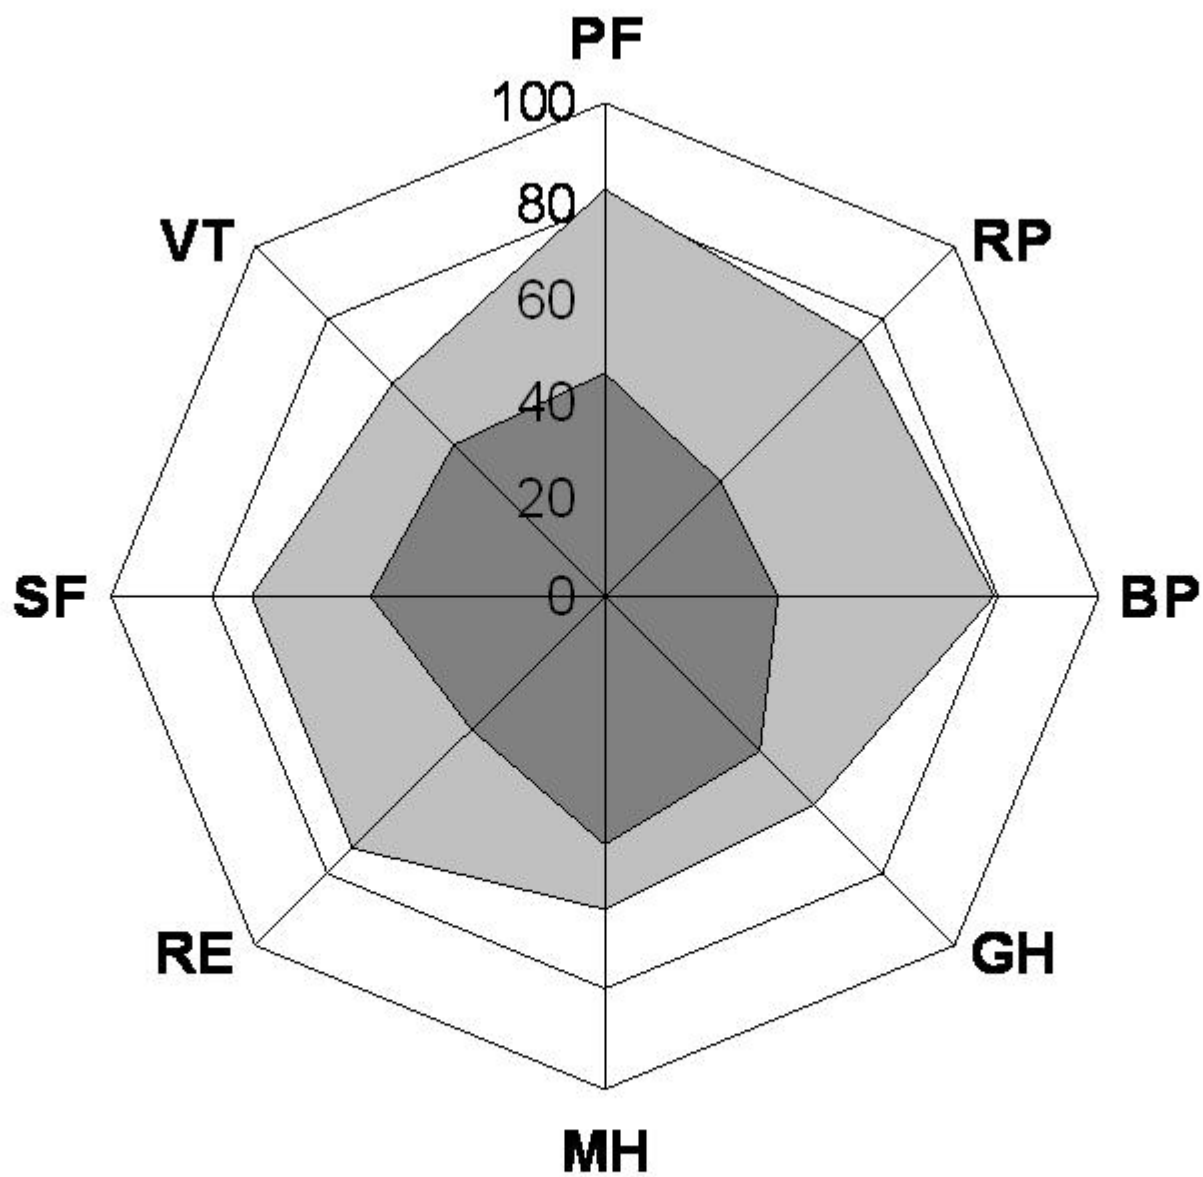

■ General population (n=1579) ■ Inflammatory Rheumatic Diseases (n=799)

Supplement: MOESM1 [file 9560672]
